# Supplementary material for: Molecular dynamics in a blue phase liquid crystal: a 1H fast field-cycling NMR relaxometry study
Source: Royal Society of Chemistry journal article supplement (doi:10.1039/c3sm51625c), 2013-01-01

# Molecular Dynamics in a Blue Phase Liquid Crystal: A $^1\text{H}$ fast field-cycling NMR relaxometry study (Electronic Supplementary Information)

Anton Gradišek,<sup>a,‡</sup> Tomaž Apih,<sup>ab</sup> Valentina Domenici,<sup>c</sup> Vladimira Novotna,<sup>d</sup> and Pedro José Sebastião<sup>e</sup>

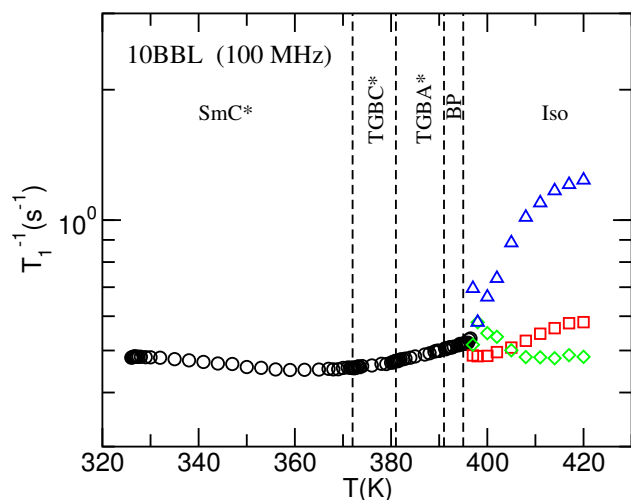

**Fig. 1** Experimental spin-lattice relaxation results obtained as a function of temperature for the Larmor frequency of 100 MHz. In color are presented the values of the three relaxation rate components of the magnetization decay obtained in the isotropic phase.

In Figure 1 are presented the  $T_1^{-1}$  results obtained as a function of temperature for the Larmor frequency 100 MHz. The analysis of the experimental results obtained in the isotropic phase were not considered in this study that is focused on the results obtained in the 10BBL mesophases.

The model fit to the experimental data was made using a non-linear least-square minimization procedure with a global minimum target for all experimental results. However, in view of the diverse relaxation mechanisms relevant for the spin-lattice relaxation in each mesophase the iterative global minimization procedure followed four steps. In each step the least square minimization of the  $T_1^{-1}$  model to experimental results of each mesophase was attempted taking into account the model fitting parameters obtained for the other mesophases.

In the following are presented the fit reports obtained for each mesophase, using the software package referred in the paper's main text. As it can be observed in addition to the  $T_1^{-1}$  temperature dependence presented in the paper's main text for

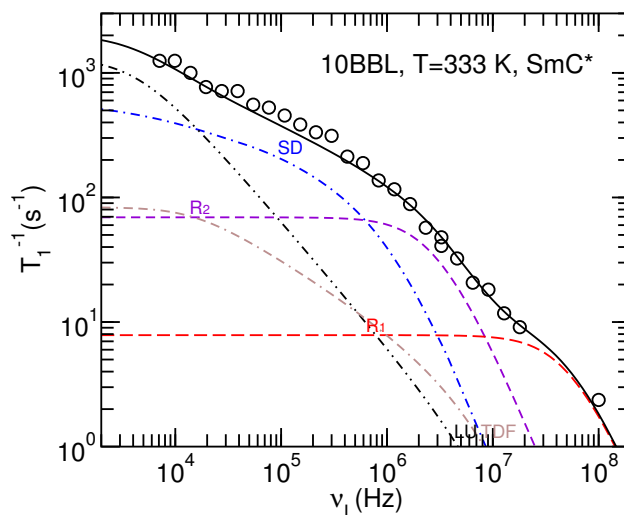

**Fig. 2** Best global model fit results of the 10BBL experimental spin-lattice relaxation dispersion results obtained at 333 K in the SmC\*, as explained in the paper's main text.

three selected Larmor frequencies the global fit was performed taking into account additional  $T_1^{-1}$  data obtained for 4 MHz, 100 kHz, and 10 kHz.

In the case of the SmC\* phase in addition to the  $T_1^{-1}$  dispersion fit at 353 K presented in the in Figure 5d) in the main text of this paper a fit of the  $T_1^{-1}$  dispersion obtained at 333 K is presented in Figure 2.

<sup>a</sup> Jozef Stefan Institute, Jamova 39, SI-1000 Ljubljana, Slovenia.

<sup>b</sup> EN-FIST Centre of Excellence, Dunajska 156, SI-1000 Ljubljana, Slovenia.

<sup>c</sup> Dipartimento di Chimica e Chimica Industriale, via Risorgimento 35, 56126 Pisa, Italy.

<sup>d</sup> Institute of Physics, Academy of Sciences of the Czech Republic, Na Slovance 2, 182 21 Prague, Czech Republic.

<sup>e</sup> Department of Physics, Instituto Superior Técnico, Technical University of Lisbon, Av. Rovisco Pais, 1049-001 Lisbon, Portugal; Centro de Física da Matéria Condensada, Av. Prof. Gama Pinto 2, 1649-003 Lisbon, Portugal; E-mail: pedro.jose.sebastiao@ist.utl.pt.

<sup>‡</sup> Present address: Korea Basic Science Institute, 169-148 Gwahak-ro, Yuseong-gu, Daejeon 305-806, Korea.

**fitteia Report**  
 (internet based fitter service)

|             |                                                                                                                                                                                                                                                                                                                                                                                                                                                                                                                              |
|-------------|------------------------------------------------------------------------------------------------------------------------------------------------------------------------------------------------------------------------------------------------------------------------------------------------------------------------------------------------------------------------------------------------------------------------------------------------------------------------------------------------------------------------------|
| Subject     | BBL, blue-fT-SDN                                                                                                                                                                                                                                                                                                                                                                                                                                                                                                             |
| Date        | Monday 22 <sup>nd</sup> July, 2013, 18:10                                                                                                                                                                                                                                                                                                                                                                                                                                                                                    |
| Affiliation | pj.sebastiao@gmail.com<br>193.136.137.244                                                                                                                                                                                                                                                                                                                                                                                                                                                                                    |
| Abstract    | Fit report produced with the fit results of function:<br>$z = \text{BPPfT}(x, y, a1, \tau1, E1, Tref) + \text{RdrfT}(x, y, ADr, \tauadr, ED, Tref) + (y < 1000.0) ? \text{SDN11.2\_DlIDp2}(x, d, n, \tauauD * \exp(ED/8.31 * (1.0/y - 1.0/Tref)), 0.0) : \text{SDN11.2\_DlIDp2}(y, d, n, \tauauD * \exp(ED/8.31 * (1.0/x - 1.0/Tref)), 0.0) + \text{BPPfT}(x, y, af, \tauauf, ER, Tref) + \text{ODFNfT}(x, y, fcm, fcM0, fcM1, Aodf0, Aodf1, Aodf2, Tref)$<br>to the 111 experimental points, considering 5 free parameters. |

$\tau1 = 1.96 \times 10^{-09}$  (fixed)  
 $a1 = 4.19 \times 10^{+08}$  (fixed)  
 $E1 = 68380$  (fixed)  
 $ADr = 3.0956 \times 10^{+07} \pm 8.7293 \times 10^{+05}$   
 $\tauadr = 3.83 \times 10^{-05}$  (fixed)  
 $fcm = 3172.2$  (fixed)  
 $fcM0 = 1.0201 \times 10^{+07} \pm 9.7814 \times 10^{+05}$   
 $fcM1 = 0$  (fixed)  
 $d = 5.6448$  (fixed)  
 $n = 6.76 \times 10^{+22}$  (fixed)

$\tauauD = 6.6307 \times 10^{-09} \pm 6.0563 \times 10^{-10}$   
 $ED = 54684$  (fixed)  
 $af = 8.81 \times 10^{+08}$  (fixed)  
 $\tauauf = 3.21 \times 10^{-10}$  (fixed)  
 $ER = 41475$  (fixed)  
 $Aodf0 = -21.738 \pm 1151.4$   
 $Aodf1 = 1011 \pm 64.358$   
 $Aodf2 = 0$  (fixed)  
 $Tref = 376$  (fixed)

$\chi^2[100000] = 66.0708$   
 $\chi^2[393] = 112.784$   
 $\chi^2[1 \times 10^{+08}] = 1.19465$

$\chi^2[1 \times 10^{+06}] = 37.9991$   
 $\chi^2[4 \times 10^{+06}] = 31.6175$   
 $\chi^2_t = 249.666$

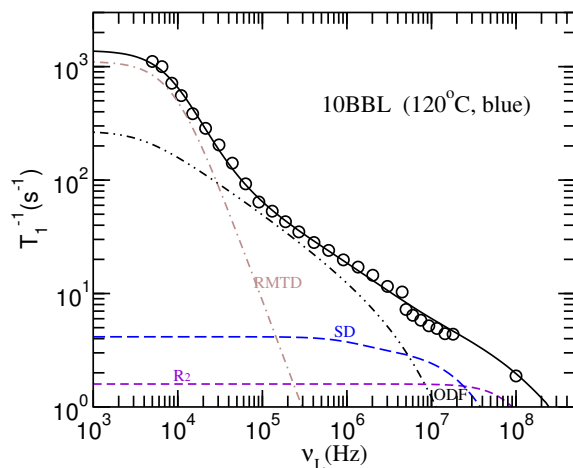

recta-1.pdf

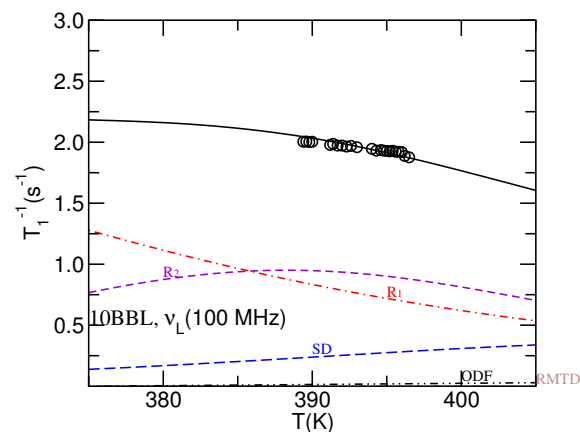

recta-2.pdf

L<sup>A</sup>T<sub>E</sub>X@ http://fitteia.ist.utl.pt, IST, Departamento de Física (printed on Monday 22<sup>nd</sup> July, 2013)

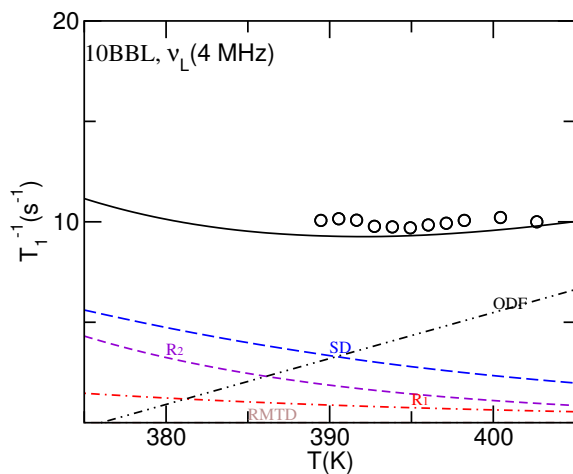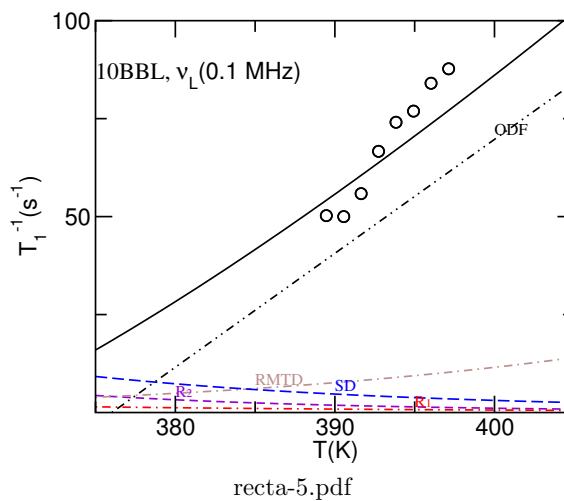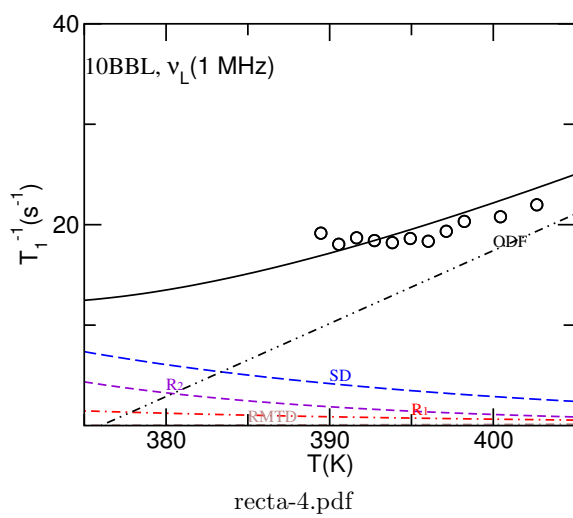

**fitteia Report**  
 (internet based fitter service)

|             |                                                                                                                                                                                                                                                                                                                                                                               |
|-------------|-------------------------------------------------------------------------------------------------------------------------------------------------------------------------------------------------------------------------------------------------------------------------------------------------------------------------------------------------------------------------------|
| Subject     | BBL, TGBA-fT                                                                                                                                                                                                                                                                                                                                                                  |
| Date        | Monday 3 <sup>rd</sup> June, 2013, 23:09                                                                                                                                                                                                                                                                                                                                      |
| Affiliation | pj.sebastiao@gmail.com<br>146.164.6.8                                                                                                                                                                                                                                                                                                                                         |
| Abstract    | Fit report produced with the fit results of function:<br>$z = \text{BPPfT}(x, y, a1, \tau1, E1, Tref) + \text{RdrfT}(x, y, ADr, \tauadr, EDr, Tref) + \text{SDSmA11\_polifT}(x, y, d, n, \tauD, ED, Tref) + \text{BPPfT}(x, y, af, \tauaf, ER, Tref) + \text{LUfT}(x, y, Alu0, Alu1, Alu2, fcm, fcM, Tref)$<br>to the 224 experimental points, considering 6 free parameters. |

$\tau1 = 1.96 \times 10^{-09}$  (fixed)  
 $a1 = 4.19 \times 10^{+08}$  (fixed)  
 $E1 = 68364$  (fixed)  
 $ADr = 4.5756 \times 10^{+07} \pm 2.2544 \times 10^{+06}$   
 $\tauadr = 3.7643 \times 10^{-05} \pm 8.9938 \times 10^{-06}$   
 $EDr = 36254 \pm 25785$   
 $fcm = 3000$  (fixed)  
 $fcM = 1 \times 10^{+07}$  (fixed)  
 $d = 5$  (fixed)  
 $n = 6.76 \times 10^{+22}$  (fixed)

$\tauD = 1.3143 \times 10^{-08} \pm 3.0538 \times 10^{-10}$   
 $ED = 65220$  (fixed)  
 $af = 8.81 \times 10^{+08}$  (fixed)  
 $\tauaf = 3.21 \times 10^{-10}$  (fixed)  
 $ER = 41475$  (fixed)  
 $Alu0 = 7.7451 \times 10^{+05} \pm 3.6348 \times 10^{+05}$   
 $Alu1 = -52182 \pm 33913$   
 $Alu2 = 8751$  (fixed)  
 $Tref = 376$  (fixed)

$\chi^2[386] = 259.879$   
 $\chi^2[1 \times 10^{+06}] = 17.4151$   
 $\chi^2[1 \times 10^{+08}] = 2.73594$   
 $\chi^2_t = 359.804$

$\chi^2[100000] = 10.9764$   
 $\chi^2[4 \times 10^{+06}] = 25.7939$   
 $\chi^2[40000] = 43.0034$

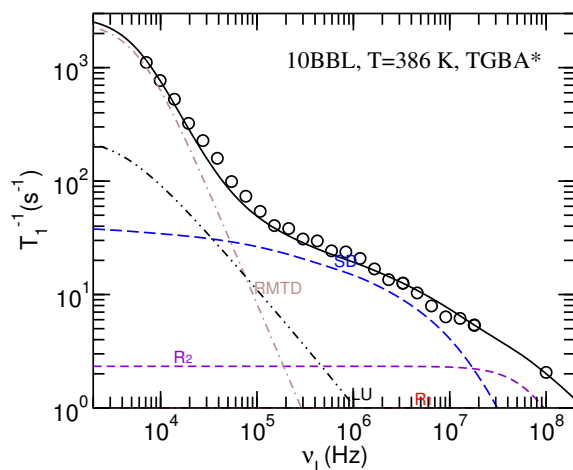

TGBA-1.pdf

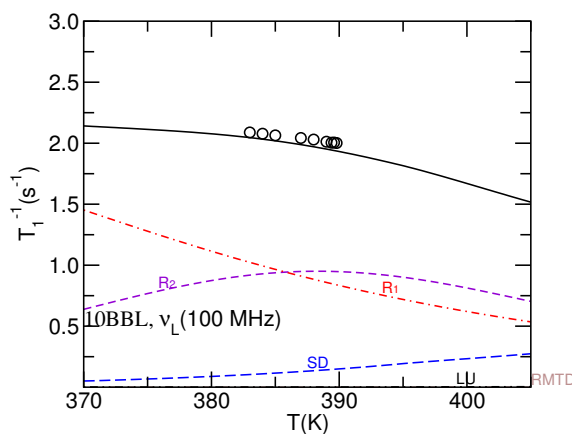

TGBA-2.pdf

L<sup>A</sup>T<sub>E</sub>X © http://fitteia.ist.utl.pt, IST, Departamento de Física (printed on Monday 3<sup>rd</sup> June, 2013)

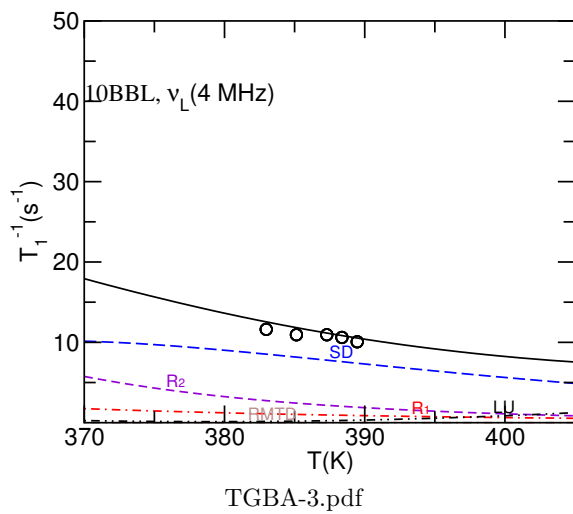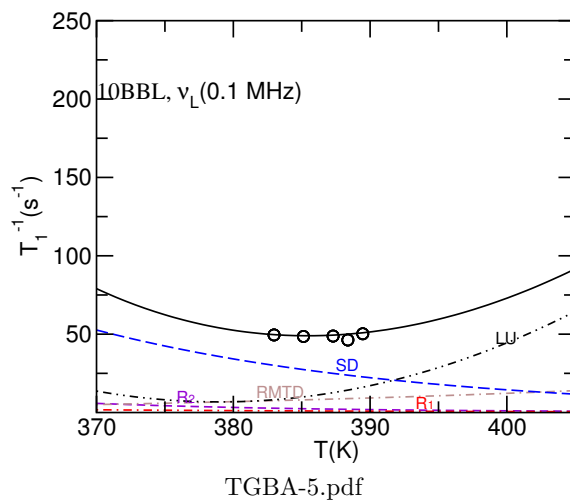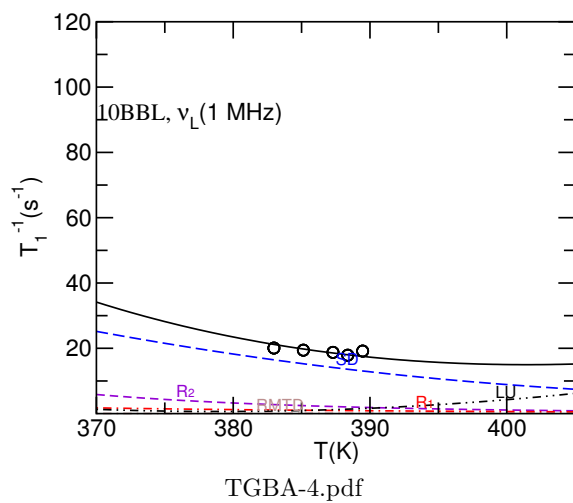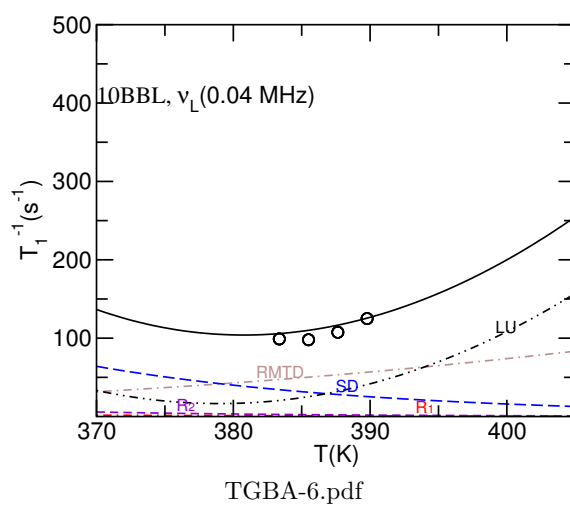

**fitteia Report**  
 (internet based fitter service)

|             |                                                                                                                                                                                                                                                                                                                                                                                 |
|-------------|---------------------------------------------------------------------------------------------------------------------------------------------------------------------------------------------------------------------------------------------------------------------------------------------------------------------------------------------------------------------------------|
| Subject     | BBL, TGBC-fT                                                                                                                                                                                                                                                                                                                                                                    |
| Date        | Monday 3 <sup>rd</sup> June, 2013, 23:07                                                                                                                                                                                                                                                                                                                                        |
| Affiliation | pj.sebastiao@gmail.com<br>146.164.6.8                                                                                                                                                                                                                                                                                                                                           |
| Abstract    | Fit report produced with the fit results of function:<br>$z = \text{BPPfT}(x, y, a1, \tau1, E1, Tref) + \text{RdrfT}(x, y, Aadr, \tauadr, Eadr, Tref) + \text{SDSmA11\_polifT}(x, y, d, n, \tauD, ED, Tref) + \text{BPPfT}(x, y, af, \tauaf, ER, Tref) + \text{LUfT}(x, y, Alu0, Alu1, Alu2, fcm, fcM, Tref)$<br>to the 328 experimental points, considering 6 free parameters. |

|                                                            |                                           |
|------------------------------------------------------------|-------------------------------------------|
| $\tau1 = 1.96 \times 10^{-09}$ (fixed)                     | $\tau D = 8.53 \times 10^{-09}$ (fixed)   |
| $a1 = 4.19 \times 10^{+08}$ (fixed)                        | $ED = 65220$ (fixed)                      |
| $E1 = 68384$ (fixed)                                       | $af = 8.81 \times 10^{+08}$ (fixed)       |
| $Aadr = 2.0938 \times 10^{+07} \pm 1.1202 \times 10^{+06}$ | $\tau af = 3.21 \times 10^{-10}$ (fixed)  |
| $\tau adr = 0.00014603 \pm 1.1799 \times 10^{-05}$         | $ER = 41475$ (fixed)                      |
| $Eadr = 4.9119 \times 10^{+05} \pm 28478$                  | $Alu0 = 9.3018 \times 10^{+05} \pm 39142$ |
| $fcm = 3000$ (fixed)                                       | $Alu1 = 14167 \pm 14492$                  |
| $fcM = 1.95 \times 10^{+08}$ (fixed)                       | $Alu2 = 8768.8 \pm 3220.6$                |
| $d = 5$ (fixed)                                            | $Tref = 376$ (fixed)                      |
| $n = 6.76 \times 10^{+22}$ (fixed)                         |                                           |

|                                       |                                       |
|---------------------------------------|---------------------------------------|
| $\chi^2[100000] = 13.6567$            | $\chi^2[1 \times 10^{+06}] = 34.3994$ |
| $\chi^2[4 \times 10^{+06}] = 1.95884$ | $\chi^2[376] = 349.53$                |
| $\chi^2[1 \times 10^{+08}] = 4.38659$ | $\chi^2[10000] = 21.5592$             |
| $\chi^2[40000] = 93.0998$             | $\chi_t^2 = 518.591$                  |

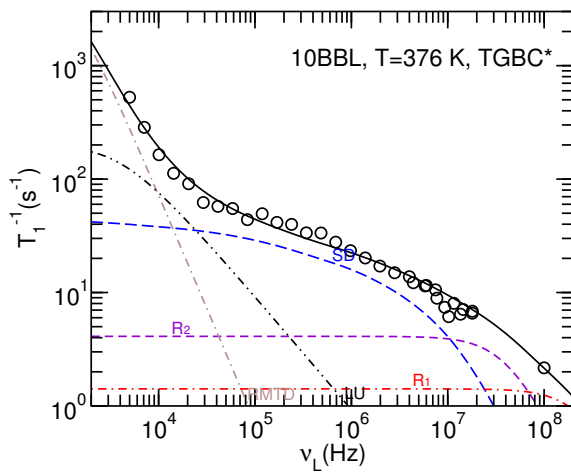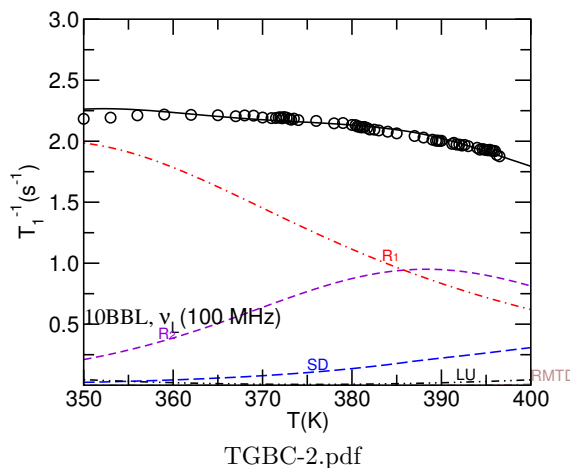

L<sup>A</sup>T<sub>E</sub>X@ http://fitteia.ist.utl.pt, IST, Departamento de Física (printed on Monday 3<sup>rd</sup> June, 2013)

L<sup>A</sup>T<sub>E</sub>X © <http://fitter1.ist.utl.pt>, IST, Departamento de Física (printed on Monday 3<sup>rd</sup> June, 2013)

*fitteia*  
report.1.0

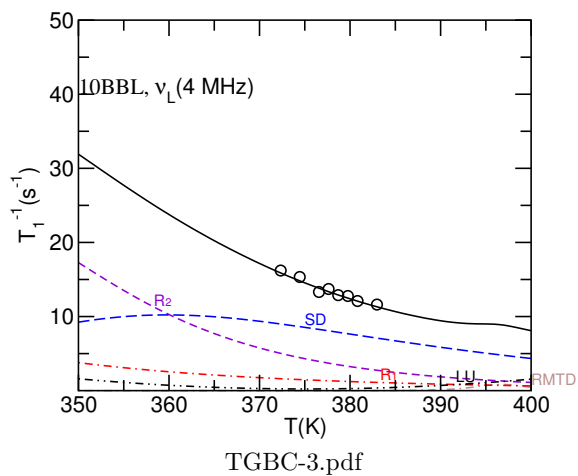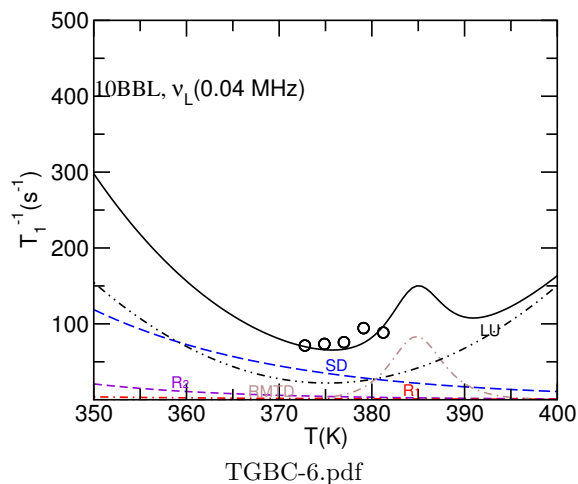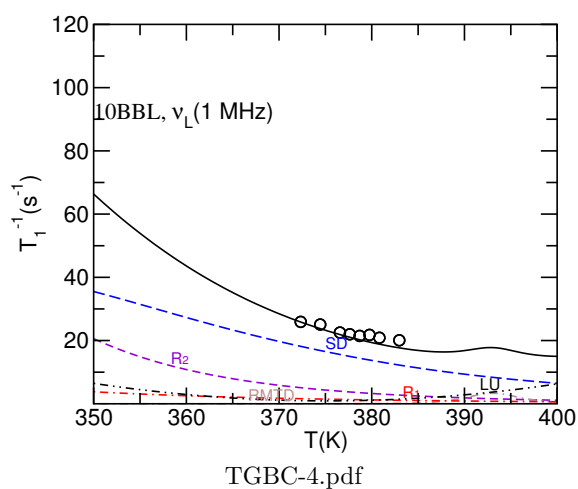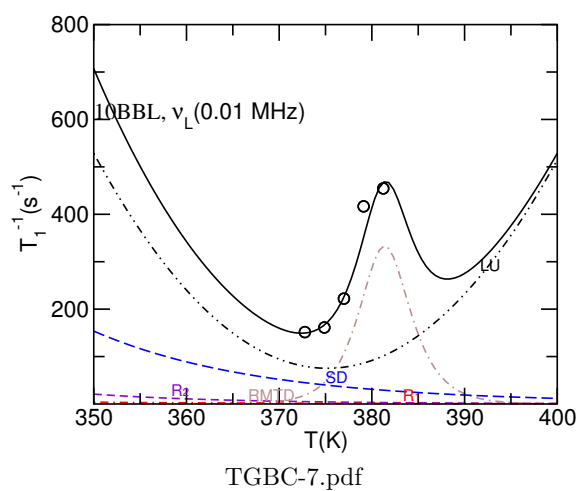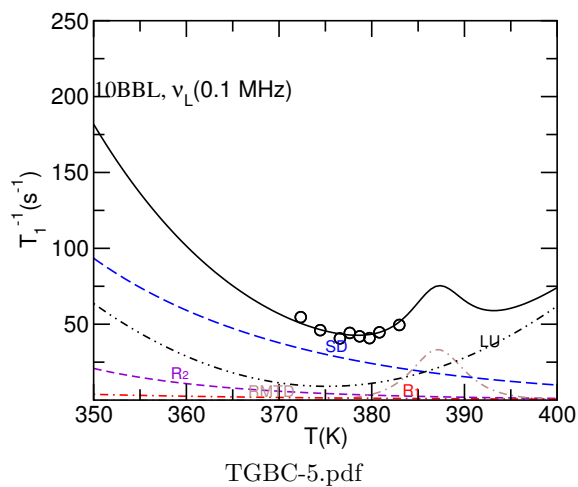

**fitteia Report**  
 (internet based fitter service)

|             |                                                                                                                                                                                                                                                                                                                                                                                                  |
|-------------|--------------------------------------------------------------------------------------------------------------------------------------------------------------------------------------------------------------------------------------------------------------------------------------------------------------------------------------------------------------------------------------------------|
| Subject     | BBL, SmC-fT-properTDF                                                                                                                                                                                                                                                                                                                                                                            |
| Date        | Monday 3 <sup>rd</sup> June, 2013, 23:02                                                                                                                                                                                                                                                                                                                                                         |
| Affiliation | pj.sebastiao@gmail.com<br>146.164.6.8                                                                                                                                                                                                                                                                                                                                                            |
| Abstract    | Fit report produced with the fit results of function:<br>$z = \text{BPPfT}(x, y, a1, \tau a1, E1, Tref) + \text{SDSmA11\_polifT}(x, y, d, n, \tau aD, ED, Tref) + \text{BPPfT}(x, y, af, \tau aF, ER, Tref) + \text{LUfT}(x, y, Alu0, Alu1, Alu2, fcm, fcM, Tref) + \text{ODFNfT}(x, y, fcm0, fcm, Aodf0, Aodf1, fcm1, 366.0)$<br>to the 458 experimental points, considering 7 free parameters. |

|                                          |                                                            |
|------------------------------------------|------------------------------------------------------------|
| $\tau a1 = 1.96 \times 10^{-09}$ (fixed) | $ER = 41475$ (fixed)                                       |
| $a1 = 4.19 \times 10^{+08}$ (fixed)      | $Alu0 = 1.8362 \times 10^{+06} \pm 1.0938 \times 10^{+05}$ |
| $E1 = 68364$ (fixed)                     | $Alu1 = 1.5136 \times 10^{+05} \pm 12287$                  |
| $fcm = 3172.2$ (fixed)                   | $Alu2 = 6039.8 \pm 357.15$                                 |
| $fcM = 1 \times 10^{+07}$ (fixed)        | $Tref = 376$ (fixed)                                       |
| $d = 5$ (fixed)                          | $Aodf0 = 242.65 \pm 321.1$                                 |
| $n = 6.76 \times 10^{+22}$ (fixed)       | $Aodf1 = -321.89 \pm 37.304$                               |
| $\tau aD = 8.53 \times 10^{-09}$ (fixed) | $fcm1 = 1000 \pm 738.44$                                   |
| $ED = 65200$ (fixed)                     | $fcm0 = 45769 \pm 9073.2$                                  |
| $af = 8.81 \times 10^{+08}$ (fixed)      | $fcM = 1 \times 10^{+07}$ (fixed)                          |
| $\tau aF = 3.21 \times 10^{-10}$ (fixed) |                                                            |

|                                       |                                       |
|---------------------------------------|---------------------------------------|
| $\chi^2[333] = 192.96$                | $\chi^2[100000] = 48.5068$            |
| $\chi^2[1 \times 10^{+06}] = 43.6518$ | $\chi^2[4 \times 10^{+06}] = 30.1934$ |
| $\chi^2[1 \times 10^{+08}] = 5.61443$ | $\chi^2[10000] = 52.9344$             |
| $\chi^2[40000] = 46.1677$             | $\chi^2[353] = 90.4336$               |
| $\chi^2_t = 510.462$                  |                                       |

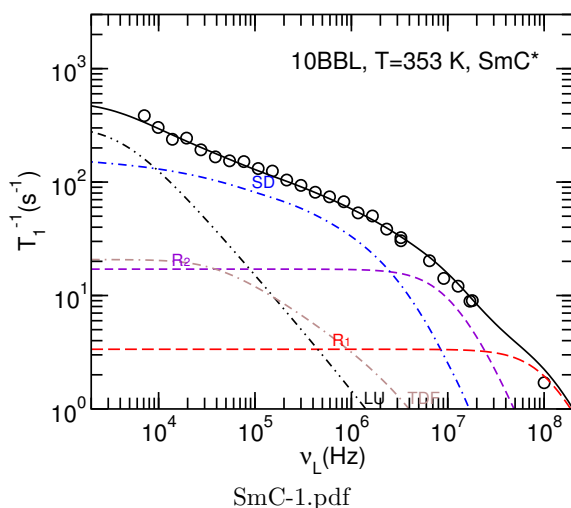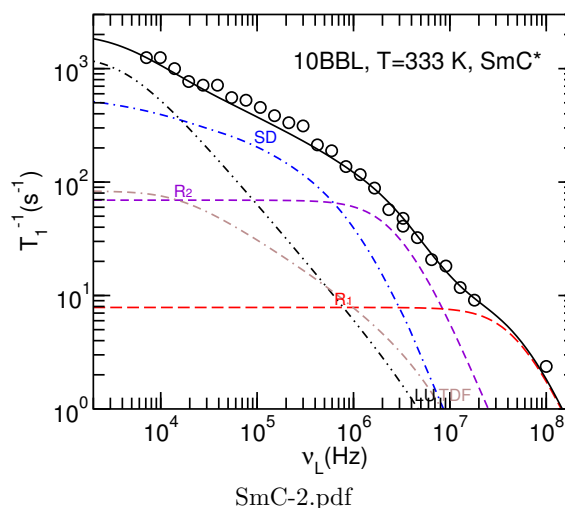



L<sup>A</sup>T<sub>E</sub>X © http://fitter1.ist.utl.pt, IST, Departamento de Física (printed on Monday 3<sup>rd</sup> June, 2013)

**fitteia**  
report 1.0

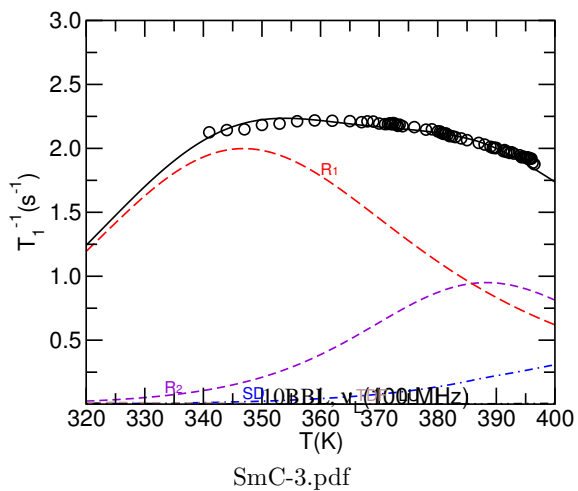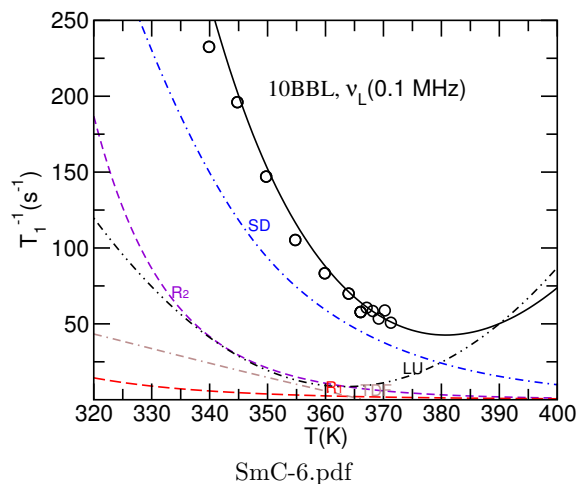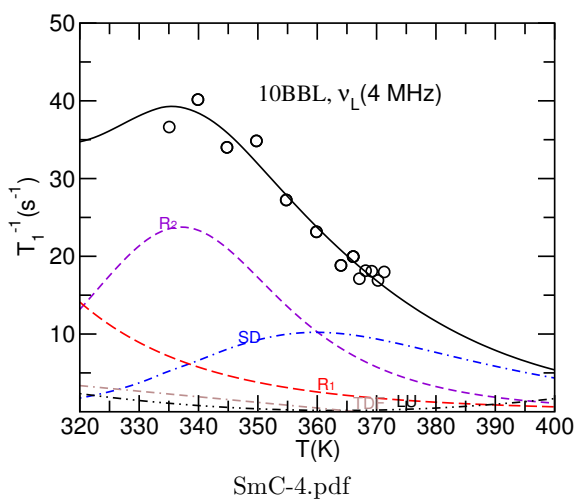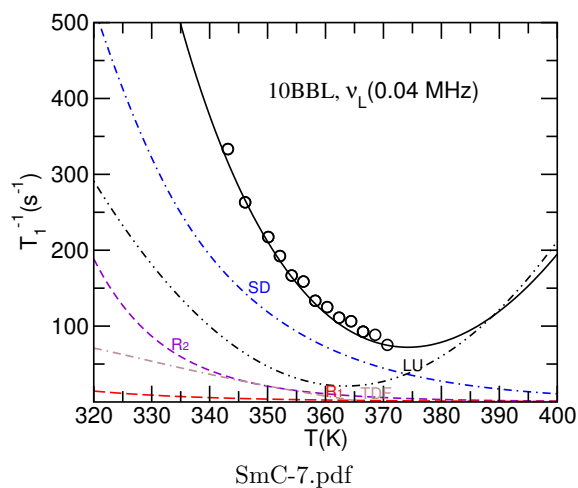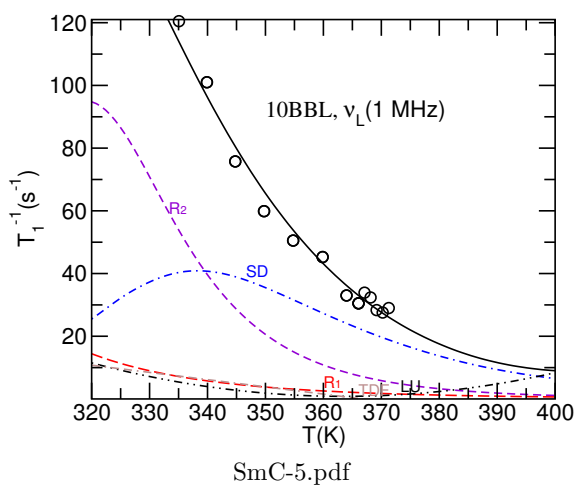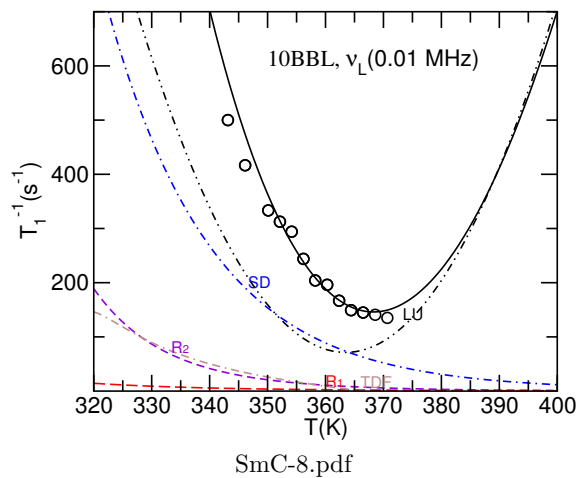

Supplement: c3sm51625c.pdf [file c3sm51625c.pdf]
